# Supplementary material for: Peroxide bond strength of antimalarial drugs containing an endoperoxide cycle. Relation with biological activity
Source: Royal Society of Chemistry journal article supplement (doi:10.1039/c1ob05088e), 2011-01-01
Supplement: c1ob05088e.pdf [file c1ob05088e.pdf]

Article submitted to *Org. Biomol. Chem.* 17 January 2011

# Peroxide Bond Strength of Antimalarial Drugs Containing an Endoperoxide Cycle. Relation with Biological Activity.

## Supporting Informations

Israel Fernández\* and Anne Robert\*

Cartesian coordinates and total energies (ZPVE included) of all drugs studied. All data have been computed at the B3LYP/6-31+G(d) level.

### Artemisinin (1), E= -960.551054

|   |              |              |              |
|---|--------------|--------------|--------------|
| C | -1.073375000 | 1.207007000  | 0.922282000  |
| C | 0.005282000  | 0.279726000  | 0.296591000  |
| C | 1.409022000  | 0.923203000  | 0.293858000  |
| C | 1.375296000  | 2.325605000  | -0.340749000 |
| C | 0.331080000  | 3.227621000  | 0.331495000  |
| C | -1.090414000 | 2.630665000  | 0.292845000  |
| C | 0.076918000  | -1.040269000 | 1.081293000  |
| O | 1.184289000  | -1.885904000 | 0.717305000  |
| C | 2.302458000  | -1.478987000 | 0.057847000  |
| C | 2.427549000  | -0.017656000 | -0.380380000 |
| C | -2.472459000 | 0.537469000  | 1.001720000  |
| C | -2.831585000 | -0.481482000 | -0.097423000 |
| C | -1.797649000 | -1.617792000 | -0.266579000 |
| O | -1.083030000 | -1.809579000 | 0.974327000  |
| C | -1.725825000 | 2.752079000  | -1.104453000 |
| O | -0.853216000 | -1.328457000 | -1.282859000 |
| O | -0.349202000 | 0.031299000  | -1.092030000 |
| C | 3.887015000  | 0.440087000  | -0.207462000 |
| C | -2.397571000 | -2.958309000 | -0.657658000 |
| O | 3.155614000  | -2.305159000 | -0.172285000 |
| H | -0.743651000 | 1.370201000  | 1.960258000  |
| H | 1.693497000  | 1.042512000  | 1.352940000  |
| H | 1.166773000  | 2.230299000  | -1.414580000 |
| H | 2.363341000  | 2.790709000  | -0.255627000 |
| H | 0.330975000  | 4.216402000  | -0.145520000 |
| H | 0.625444000  | 3.388734000  | 1.379758000  |
| H | -1.714504000 | 3.233756000  | 0.969689000  |
| H | 0.204034000  | -0.817344000 | 2.145496000  |
| H | 2.200091000  | -0.039046000 | -1.455391000 |
| H | -3.239208000 | 1.322730000  | 1.007743000  |
| H | -2.559901000 | 0.022873000  | 1.964479000  |
| H | -2.965269000 | -0.003884000 | -1.072951000 |
| H | -3.793097000 | -0.935248000 | 0.171828000  |
| H | -1.768694000 | 3.809597000  | -1.394333000 |
| H | -2.753240000 | 2.372021000  | -1.113566000 |
| H | -1.168456000 | 2.209571000  | -1.871979000 |
| H | 4.564521000  | -0.293760000 | -0.649298000 |
| H | 4.145235000  | 0.542753000  | 0.854208000  |
| H | 4.056941000  | 1.404381000  | -0.695398000 |
| H | -1.601976000 | -3.670887000 | -0.891401000 |
| H | -3.053505000 | -2.843105000 | -1.525995000 |
| H | -2.979438000 | -3.344671000 | 0.184627000  |

Article submitted to *Org. Biomol. Chem.* 17 January 2011

**Artemisinin (1T), E= -960.512084**

|   |              |              |              |
|---|--------------|--------------|--------------|
| C | 0.489315000  | 1.547945000  | -0.763252000 |
| C | -0.202860000 | 0.314439000  | -0.122487000 |
| C | -1.757221000 | 0.321777000  | -0.376174000 |
| C | -2.357773000 | 1.642215000  | 0.135685000  |
| C | -1.650797000 | 2.864812000  | -0.470216000 |
| C | -0.125930000 | 2.871203000  | -0.223491000 |
| C | 0.269282000  | -0.998230000 | -0.884941000 |
| O | -0.303445000 | -2.175283000 | -0.326986000 |
| C | -1.554205000 | -2.201729000 | 0.217056000  |
| C | -2.405188000 | -0.924150000 | 0.253519000  |
| C | 2.046804000  | 1.514656000  | -0.704481000 |
| C | 2.702202000  | 0.657375000  | 0.385082000  |
| C | 2.531296000  | -0.923013000 | 0.139831000  |
| O | 1.633490000  | -1.154547000 | -0.990217000 |
| C | 0.217805000  | 3.210667000  | 1.237940000  |
| O | 2.122242000  | -1.418654000 | 1.300882000  |
| O | 0.020178000  | 0.157534000  | 1.203897000  |
| C | -3.790123000 | -1.233669000 | -0.349566000 |
| C | 3.855018000  | -1.568032000 | -0.321204000 |
| O | -1.961994000 | -3.251754000 | 0.653971000  |
| H | 0.220020000  | 1.523210000  | -1.830001000 |
| H | -1.891988000 | 0.286919000  | -1.468721000 |
| H | -2.291002000 | 1.665759000  | 1.231030000  |
| H | -3.425581000 | 1.678050000  | -0.113017000 |
| H | -2.094550000 | 3.784875000  | -0.067755000 |
| H | -1.836965000 | 2.880181000  | -1.554722000 |
| H | 0.299057000  | 3.674564000  | -0.844669000 |
| H | -0.081649000 | -0.895702000 | -1.918274000 |
| H | -2.535640000 | -0.736465000 | 1.326873000  |
| H | 2.410063000  | 2.540944000  | -0.554485000 |
| H | 2.436375000  | 1.196523000  | -1.677268000 |
| H | 2.311544000  | 0.900577000  | 1.372959000  |
| H | 3.782325000  | 0.835724000  | 0.400362000  |
| H | -0.192185000 | 4.195713000  | 1.494089000  |
| H | 1.300969000  | 3.257091000  | 1.398489000  |
| H | -0.183231000 | 2.479919000  | 1.946028000  |
| H | -4.224685000 | -2.111259000 | 0.135226000  |
| H | -3.717921000 | -1.438276000 | -1.425200000 |
| H | -4.471330000 | -0.387949000 | -0.209862000 |
| H | 3.701478000  | -2.638108000 | -0.482363000 |
| H | 4.615927000  | -1.419241000 | 0.448793000  |
| H | 4.179457000  | -1.109012000 | -1.259701000 |

**6,6'-dimethyltrioxane (2), E= -691.277595**

|   |              |              |              |
|---|--------------|--------------|--------------|
| C | -2.547519000 | 1.114958000  | 0.509897000  |
| C | -1.316464000 | 1.455605000  | -0.352623000 |
| C | -0.274792000 | 0.334017000  | -0.315589000 |
| C | -0.889740000 | -0.999900000 | -0.773886000 |
| C | -2.110344000 | -1.386661000 | 0.083216000  |
| C | -3.126028000 | -0.256906000 | 0.190659000  |
| O | 0.225612000  | 0.279476000  | 1.019203000  |
| C | 1.404195000  | -0.512755000 | 1.175396000  |
| C | 2.481908000  | -0.135101000 | 0.144216000  |
| O | 1.845064000  | -0.204070000 | -1.160749000 |
| O | 0.757780000  | 0.774937000  | -1.193580000 |
| O | -4.322926000 | -0.442018000 | 0.051537000  |
| C | 3.562114000  | -1.213872000 | 0.066887000  |
| C | 3.081150000  | 1.251671000  | 0.390695000  |
| H | -3.333297000 | 1.866223000  | 0.388876000  |
| H | -2.249002000 | 1.106953000  | 1.567739000  |
| H | -0.850163000 | 2.381587000  | -0.001840000 |

*Article submitted to Org. Biomol. Chem. 17 January 2011*

|   |              |              |              |
|---|--------------|--------------|--------------|
| H | -1.614409000 | 1.607319000  | -1.396562000 |
| H | -0.143962000 | -1.798194000 | -0.757531000 |
| H | -1.186844000 | -0.876078000 | -1.822198000 |
| H | -1.777226000 | -1.621296000 | 1.104912000  |
| H | -2.612147000 | -2.273455000 | -0.315091000 |
| H | 1.161540000  | -1.580958000 | 1.080228000  |
| H | 1.750605000  | -0.326042000 | 2.196255000  |
| H | 4.311907000  | -0.950158000 | -0.685964000 |
| H | 3.132733000  | -2.186143000 | -0.197076000 |
| H | 4.066402000  | -1.307403000 | 1.035846000  |
| H | 3.755463000  | 1.517782000  | -0.430016000 |
| H | 3.654093000  | 1.252153000  | 1.325706000  |
| H | 2.303179000  | 2.014773000  | 0.462220000  |

**6,6'-dimethyltrioxane (2T), E= -691.240227**

|   |              |              |              |
|---|--------------|--------------|--------------|
| C | 1.826428000  | 1.269444000  | 0.626031000  |
| C | 0.972408000  | 0.206936000  | 1.332433000  |
| C | 0.478708000  | -0.914751000 | 0.338151000  |
| C | 1.746464000  | -1.551805000 | -0.356844000 |
| C | 2.591080000  | -0.495626000 | -1.083181000 |
| C | 2.965087000  | 0.681134000  | -0.193239000 |
| O | -0.276600000 | -0.265542000 | -0.721947000 |
| C | -1.630964000 | -0.594676000 | -0.856236000 |
| C | -2.639648000 | 0.358453000  | -0.050751000 |
| O | -2.331967000 | 0.159904000  | 1.261878000  |
| O | -0.156145000 | -1.853984000 | 1.002787000  |
| O | 4.094467000  | 1.137648000  | -0.162505000 |
| C | -4.067728000 | -0.113604000 | -0.391031000 |
| C | -2.396211000 | 1.823740000  | -0.471563000 |
| H | 2.247108000  | 1.965865000  | 1.358911000  |
| H | 1.193074000  | 1.846696000  | -0.061502000 |
| H | 0.080315000  | 0.646510000  | 1.783967000  |
| H | 1.544453000  | -0.299284000 | 2.116302000  |
| H | 1.393206000  | -2.316224000 | -1.055064000 |
| H | 2.323557000  | -2.047429000 | 0.429560000  |
| H | 2.021493000  | -0.100337000 | -1.934949000 |
| H | 3.510729000  | -0.946607000 | -1.470623000 |
| H | -1.826972000 | -1.624999000 | -0.551128000 |
| H | -1.884804000 | -0.447237000 | -1.911236000 |
| H | -4.792374000 | 0.494597000  | 0.161237000  |
| H | -4.206683000 | -1.158295000 | -0.093686000 |
| H | -4.285645000 | -0.014230000 | -1.461390000 |
| H | -3.056176000 | 2.483696000  | 0.101987000  |
| H | -2.612714000 | 1.963980000  | -1.537296000 |
| H | -1.360350000 | 2.113629000  | -0.279417000 |

**cis-[5-6]-terpentrioxane (Cis-3m), E= -905.906115**

|   |              |              |              |
|---|--------------|--------------|--------------|
| C | -0.668508000 | 0.321317000  | -0.883492000 |
| C | -2.008621000 | -0.331360000 | -1.093021000 |
| C | -3.026426000 | -0.284936000 | -0.218200000 |
| C | -4.333589000 | -1.008914000 | -0.511936000 |
| C | -0.697199000 | 1.386600000  | 0.233877000  |
| C | -1.246963000 | 2.719389000  | -0.280367000 |
| C | -1.465965000 | 0.854716000  | 1.448212000  |
| C | -2.914262000 | 0.492390000  | 1.078852000  |
| C | -4.530286000 | -2.231707000 | 0.409083000  |
| C | -5.555481000 | -0.072004000 | -0.443372000 |
| H | -0.341589000 | 0.802119000  | -1.817954000 |
| H | -2.112673000 | -0.903181000 | -2.014714000 |
| H | -4.264171000 | -1.386807000 | -1.541276000 |
| H | -2.269373000 | 2.598201000  | -0.649960000 |

*Article submitted to Org. Biomol. Chem. 17 January 2011*

|   |              |              |              |
|---|--------------|--------------|--------------|
| H | -0.628779000 | 3.100176000  | -1.100258000 |
| H | -1.249828000 | 3.463298000  | 0.523455000  |
| H | -0.949376000 | -0.034566000 | 1.820801000  |
| H | -1.447326000 | 1.604905000  | 2.247825000  |
| H | -3.523297000 | 1.406064000  | 1.000542000  |
| H | -3.363775000 | -0.082630000 | 1.898796000  |
| H | -5.434870000 | -2.782221000 | 0.121984000  |
| H | -4.646165000 | -1.936465000 | 1.459198000  |
| H | -3.678406000 | -2.917826000 | 0.342541000  |
| H | -5.433794000 | 0.793219000  | -1.106246000 |
| H | -5.722680000 | 0.301312000  | 0.574516000  |
| H | -6.462737000 | -0.606619000 | -0.749892000 |
| O | 0.260808000  | -0.740661000 | -0.569984000 |
| C | 1.544433000  | -0.324318000 | -0.121601000 |
| O | 1.379697000  | 0.535544000  | 1.011166000  |
| O | 0.669896000  | 1.733373000  | 0.575124000  |
| C | 2.236121000  | -1.572399000 | 0.436362000  |
| C | 3.691770000  | -1.321225000 | 0.855200000  |
| C | 4.519708000  | -0.690450000 | -0.272882000 |
| C | 3.828744000  | 0.589026000  | -0.784946000 |
| C | 2.380390000  | 0.332985000  | -1.233114000 |
| N | 5.903055000  | -0.502256000 | 0.185765000  |
| H | 2.191194000  | -2.331437000 | -0.355095000 |
| H | 1.641944000  | -1.949517000 | 1.275749000  |
| H | 3.712054000  | -0.653808000 | 1.728444000  |
| H | 4.158622000  | -2.263679000 | 1.163611000  |
| H | 4.566770000  | -1.410392000 | -1.104856000 |
| H | 3.835590000  | 1.342967000  | 0.014725000  |
| H | 4.401173000  | 1.009286000  | -1.623671000 |
| H | 1.917831000  | 1.270370000  | -1.552613000 |
| H | 2.364653000  | -0.350336000 | -2.092805000 |
| H | 6.479860000  | -0.115341000 | -0.560262000 |
| H | 5.931365000  | 0.167984000  | 0.954685000  |

**cis-[5-6]-terpentrioxane (Cis-3m-T), E= -905.860190**

|   |              |              |              |
|---|--------------|--------------|--------------|
| C | -0.615433000 | 0.404814000  | -0.631809000 |
| C | -1.813868000 | -0.469990000 | -0.912869000 |
| C | -2.961275000 | -0.451655000 | -0.215750000 |
| C | -4.082525000 | -1.428645000 | -0.546376000 |
| C | -1.009725000 | 1.666891000  | 0.188718000  |
| C | -1.729903000 | 2.687721000  | -0.752467000 |
| C | -1.907514000 | 1.253568000  | 1.370535000  |
| C | -3.189360000 | 0.545097000  | 0.903754000  |
| C | -4.273150000 | -2.482341000 | 0.564849000  |
| C | -5.414980000 | -0.718009000 | -0.855619000 |
| H | -0.166878000 | 0.733917000  | -1.579512000 |
| H | -1.678149000 | -1.203364000 | -1.707559000 |
| H | -3.777734000 | -1.967082000 | -1.454450000 |
| H | -2.599934000 | 2.211194000  | -1.213097000 |
| H | -1.050555000 | 3.020612000  | -1.542901000 |
| H | -2.052756000 | 3.558934000  | -0.175738000 |
| H | -1.316929000 | 0.581677000  | 2.003666000  |
| H | -2.147597000 | 2.140206000  | 1.968324000  |
| H | -3.927249000 | 1.289776000  | 0.567772000  |
| H | -3.658788000 | 0.044618000  | 1.761142000  |
| H | -5.022973000 | -3.223054000 | 0.260312000  |
| H | -4.622366000 | -2.028511000 | 1.500389000  |
| H | -3.336367000 | -3.011158000 | 0.773621000  |
| H | -5.298237000 | 0.022262000  | -1.656450000 |
| H | -5.812968000 | -0.202813000 | 0.027232000  |
| H | -6.168880000 | -1.446823000 | -1.177379000 |
| O | 0.311926000  | -0.463990000 | 0.047952000  |

*Article submitted to Org. Biomol. Chem. 17 January 2011*

|   |             |              |              |
|---|-------------|--------------|--------------|
| C | 1.681231000 | -0.100684000 | 0.265904000  |
| O | 1.864074000 | 0.768844000  | 1.270785000  |
| O | 0.088537000 | 2.392892000  | 0.600552000  |
| C | 2.361199000 | -1.457417000 | 0.687823000  |
| C | 3.880318000 | -1.354072000 | 0.816067000  |
| C | 4.538892000 | -0.829679000 | -0.466632000 |
| C | 3.906239000 | 0.515818000  | -0.875892000 |
| C | 2.382907000 | 0.436976000  | -1.026305000 |
| N | 5.995789000 | -0.793254000 | -0.287706000 |
| H | 2.075261000 | -2.178760000 | -0.086826000 |
| H | 1.897148000 | -1.780511000 | 1.624535000  |
| H | 4.137270000 | -0.689759000 | 1.652371000  |
| H | 4.294499000 | -2.341829000 | 1.052255000  |
| H | 4.345303000 | -1.557801000 | -1.269715000 |
| H | 4.161078000 | 1.275602000  | -0.125212000 |
| H | 4.338870000 | 0.850809000  | -1.829527000 |
| H | 1.971928000 | 1.423091000  | -1.258256000 |
| H | 2.107315000 | -0.252186000 | -1.835857000 |
| H | 6.457643000 | -0.485595000 | -1.142532000 |
| H | 6.246891000 | -0.123004000 | 0.439444000  |

**Trans-[5-6]-terpentrioxane (Trans-3m), E= -905.904811**

|   |              |              |              |
|---|--------------|--------------|--------------|
| C | 0.476493000  | 0.357545000  | -0.736460000 |
| C | 0.868957000  | 1.769480000  | -0.253645000 |
| H | 0.066683000  | 0.438076000  | -1.754774000 |
| C | 1.744509000  | 1.676237000  | 1.000207000  |
| H | 1.162945000  | 1.195871000  | 1.792380000  |
| H | 1.995110000  | 2.686722000  | 1.344932000  |
| C | 3.019854000  | 0.862074000  | 0.730449000  |
| H | 3.504079000  | 0.616238000  | 1.685060000  |
| H | 3.757485000  | 1.473995000  | 0.186210000  |
| C | -1.638151000 | 0.621593000  | 0.433407000  |
| C | -2.399500000 | -0.059808000 | 1.575673000  |
| C | -2.563186000 | 0.882430000  | -0.768748000 |
| C | -3.103526000 | -1.340470000 | 1.101302000  |
| H | -3.133040000 | 0.657689000  | 1.964853000  |
| H | -1.690816000 | -0.280457000 | 2.380392000  |
| C | -3.267587000 | -0.404034000 | -1.226819000 |
| H | -3.301339000 | 1.630377000  | -0.451307000 |
| H | -2.005456000 | 1.331941000  | -1.594128000 |
| C | -4.043505000 | -1.068303000 | -0.081125000 |
| H | -3.668353000 | -1.771150000 | 1.940177000  |
| H | -2.361271000 | -2.086646000 | 0.794614000  |
| H | -3.950391000 | -0.168997000 | -2.055700000 |
| H | -2.534249000 | -1.124777000 | -1.610115000 |
| H | -4.817817000 | -0.353119000 | 0.259893000  |
| O | -1.145910000 | 1.834011000  | 1.006653000  |
| O | -0.346191000 | 2.521428000  | -0.004423000 |
| O | -0.535433000 | -0.221196000 | 0.117597000  |
| C | 1.523804000  | 2.580274000  | -1.375058000 |
| H | 0.836230000  | 2.694224000  | -2.219821000 |
| H | 1.792872000  | 3.578175000  | -1.012776000 |
| H | 2.428790000  | 2.081409000  | -1.734372000 |
| C | 1.635310000  | -0.604501000 | -0.735087000 |
| C | 2.780545000  | -0.407993000 | -0.062997000 |
| H | 1.476926000  | -1.517978000 | -1.303229000 |
| C | 3.923905000  | -1.416640000 | -0.045719000 |
| H | 4.857906000  | -0.831904000 | -0.048444000 |
| C | 3.968067000  | -2.356904000 | -1.259762000 |
| H | 4.876330000  | -2.970503000 | -1.227799000 |
| H | 3.112977000  | -3.043592000 | -1.272073000 |
| H | 3.967596000  | -1.798328000 | -2.202829000 |

*Article submitted to Org. Biomol. Chem. 17 January 2011*

|   |              |              |              |
|---|--------------|--------------|--------------|
| C | 3.905559000  | -2.237689000 | 1.263779000  |
| H | 4.785394000  | -2.890508000 | 1.320609000  |
| H | 3.908568000  | -1.597092000 | 2.152774000  |
| H | 3.008835000  | -2.867441000 | 1.306934000  |
| N | -4.629203000 | -2.332991000 | -0.547842000 |
| H | -5.164818000 | -2.777862000 | 0.196588000  |
| H | -5.275780000 | -2.167118000 | -1.318149000 |

**Trans-[5-6]-terpentrioxane (Trans-3m-T), E= -905.858322**

|   |              |              |              |
|---|--------------|--------------|--------------|
| N | 5.862074000  | -0.723219000 | 0.272793000  |
| H | 6.304985000  | -0.379840000 | 1.124029000  |
| H | 6.284076000  | -1.626866000 | 0.062724000  |
| C | 4.411087000  | -0.857013000 | 0.458229000  |
| H | 4.159889000  | -1.551714000 | 1.284508000  |
| C | 3.804682000  | 0.511183000  | 0.795753000  |
| H | 4.242904000  | 0.895286000  | 1.728278000  |
| H | 4.067863000  | 1.218405000  | 0.000752000  |
| C | 2.280327000  | 0.442747000  | 0.954538000  |
| H | 2.013988000  | -0.206495000 | 1.799818000  |
| H | 1.885085000  | 1.443274000  | 1.156178000  |
| C | 3.775147000  | -1.407380000 | -0.824761000 |
| H | 4.067356000  | -0.765610000 | -1.663779000 |
| H | 4.167516000  | -2.413258000 | -1.034736000 |
| C | 2.251224000  | -1.486274000 | -0.713935000 |
| H | 1.944351000  | -2.189705000 | 0.070359000  |
| H | 1.794852000  | -1.820229000 | -1.650540000 |
| C | 1.587879000  | -0.118677000 | -0.314457000 |
| O | 1.753097000  | 0.681060000  | -1.389878000 |
| O | 0.190416000  | 2.413020000  | -0.378941000 |
| O | 0.201589000  | -0.460037000 | -0.093039000 |
| C | -0.954516000 | 1.786637000  | 0.018294000  |
| C | -1.733716000 | 2.709858000  | 0.981191000  |
| H | -1.113021000 | 2.935954000  | 1.855793000  |
| H | -2.663921000 | 2.255908000  | 1.333373000  |
| H | -1.960905000 | 3.654349000  | 0.476221000  |
| C | -0.675566000 | 0.380942000  | 0.661052000  |
| H | -0.242309000 | 0.564833000  | 1.655376000  |
| C | -1.947836000 | -0.418035000 | 0.809319000  |
| H | -1.915451000 | -1.204767000 | 1.559140000  |
| C | -3.036130000 | -0.252146000 | 0.043631000  |
| C | -3.100539000 | 0.848670000  | -0.995278000 |
| H | -3.831448000 | 1.600686000  | -0.659208000 |
| H | -3.508743000 | 0.450263000  | -1.935077000 |
| C | -1.756835000 | 1.517043000  | -1.311214000 |
| H | -1.132034000 | 0.871862000  | -1.933283000 |
| H | -1.904996000 | 2.465854000  | -1.836053000 |
| C | -4.287325000 | -1.115312000 | 0.158300000  |
| H | -5.147756000 | -0.445477000 | -0.001488000 |
| C | -4.477566000 | -1.785113000 | 1.527651000  |
| C | -4.324370000 | -2.177026000 | -0.964460000 |
| H | -4.227469000 | -1.729279000 | -1.959860000 |
| H | -3.505089000 | -2.895244000 | -0.839438000 |
| H | -5.271319000 | -2.730311000 | -0.939326000 |
| H | -3.705418000 | -2.539787000 | 1.720466000  |
| H | -5.447205000 | -2.295652000 | 1.565312000  |
| H | -4.446813000 | -1.052866000 | 2.342669000  |

**Yingzhaosu fragment (4m), E= -580.090624**

|   |              |              |              |
|---|--------------|--------------|--------------|
| C | -0.994216000 | -1.014393000 | 0.714049000  |
| H | -1.355375000 | -1.948948000 | 1.164195000  |
| O | -0.111655000 | -1.533397000 | -0.300120000 |

*Article submitted to Org. Biomol. Chem. 17 January 2011*

|   |              |              |              |
|---|--------------|--------------|--------------|
| O | 0.493229000  | -0.435301000 | -1.061653000 |
| C | 1.300357000  | 0.426779000  | -0.226185000 |
| C | 0.427609000  | 0.987835000  | 0.939997000  |
| H | 1.093539000  | 1.564309000  | 1.597246000  |
| C | -0.740525000 | 1.900449000  | 0.500424000  |
| H | -1.218271000 | 2.270595000  | 1.419645000  |
| H | -0.371987000 | 2.789764000  | -0.024434000 |
| C | -1.793699000 | 1.179830000  | -0.367081000 |
| H | -2.692812000 | 1.807481000  | -0.440834000 |
| H | -1.411228000 | 1.058656000  | -1.385133000 |
| C | -2.197948000 | -0.211518000 | 0.175588000  |
| H | -2.834887000 | -0.050443000 | 1.061380000  |
| C | -0.164167000 | -0.203895000 | 1.711307000  |
| H | -0.796213000 | 0.150353000  | 2.536128000  |
| H | 0.621198000  | -0.838054000 | 2.136045000  |
| C | -3.009520000 | -1.005580000 | -0.854610000 |
| H | -3.887831000 | -0.434614000 | -1.180620000 |
| H | -3.363819000 | -1.957269000 | -0.438205000 |
| H | -2.401626000 | -1.231471000 | -1.737295000 |
| C | 1.751607000  | 1.514987000  | -1.216406000 |
| H | 2.366628000  | 1.068009000  | -2.002917000 |
| H | 2.353942000  | 2.265883000  | -0.691953000 |
| H | 0.897350000  | 2.014815000  | -1.680854000 |
| C | 2.536331000  | -0.273560000 | 0.312089000  |
| H | 3.113966000  | 0.321555000  | 1.022153000  |
| C | 2.971391000  | -1.484828000 | -0.038929000 |
| H | 2.417628000  | -2.109416000 | -0.733244000 |
| H | 3.893882000  | -1.888266000 | 0.371435000  |

**Yingzhaosu fragment (4m-T), E= -580.049610**

|   |              |              |              |
|---|--------------|--------------|--------------|
| C | -1.296024000 | -1.062631000 | 0.618021000  |
| H | -1.881771000 | -1.823003000 | 1.169726000  |
| O | -0.777181000 | -1.599227000 | -0.517290000 |
| O | 0.984224000  | 0.016875000  | -1.374103000 |
| C | 1.567999000  | 0.367418000  | -0.175960000 |
| C | 0.504325000  | 0.777806000  | 0.917760000  |
| H | 1.100462000  | 1.228565000  | 1.725102000  |
| C | -0.533630000 | 1.827071000  | 0.458859000  |
| H | -0.986379000 | 2.254367000  | 1.366781000  |
| H | -0.046441000 | 2.663219000  | -0.054242000 |
| C | -1.653701000 | 1.262802000  | -0.432652000 |
| H | -2.407739000 | 2.046271000  | -0.596898000 |
| H | -1.246552000 | 0.991771000  | -1.410654000 |
| C | -2.359080000 | 0.047615000  | 0.181032000  |
| H | -2.806003000 | 0.339799000  | 1.144171000  |
| C | -0.234308000 | -0.424130000 | 1.538099000  |
| H | -0.752672000 | -0.086770000 | 2.447499000  |
| H | 0.472221000  | -1.202667000 | 1.844369000  |
| C | -3.454953000 | -0.525862000 | -0.718971000 |
| H | -4.242122000 | 0.222833000  | -0.873725000 |
| H | -3.919259000 | -1.412801000 | -0.271101000 |
| H | -3.057374000 | -0.811175000 | -1.698040000 |
| C | 2.450672000  | 1.606321000  | -0.551708000 |
| H | 3.199422000  | 1.310927000  | -1.291176000 |
| H | 2.965593000  | 1.961733000  | 0.348501000  |
| H | 1.846104000  | 2.416652000  | -0.965473000 |
| C | 2.505624000  | -0.705245000 | 0.369210000  |
| H | 3.013339000  | -0.453435000 | 1.302690000  |
| C | 2.739777000  | -1.878413000 | -0.222351000 |
| H | 2.238829000  | -2.145472000 | -1.148642000 |
| H | 3.433786000  | -2.598510000 | 0.204226000  |

Article submitted to *Org. Biomol. Chem.* 17 January 2011

**Arteflene (5), E= -1559.214944**

|   |              |              |              |
|---|--------------|--------------|--------------|
| C | 3.621134000  | -0.975828000 | -1.319672000 |
| C | 4.474248000  | 0.220776000  | -0.886346000 |
| C | 3.729313000  | 0.921307000  | 0.262934000  |
| C | 2.290352000  | 1.303084000  | -0.205778000 |
| O | 1.636119000  | 0.076415000  | -0.609893000 |
| O | 2.336423000  | -0.496476000 | -1.759215000 |
| C | 3.503746000  | -2.042140000 | -0.209438000 |
| C | 3.095159000  | -1.413815000 | 1.130040000  |
| C | 3.687837000  | -0.046039000 | 1.467466000  |
| C | 2.628580000  | -3.235150000 | -0.599787000 |
| O | 2.386658000  | -2.005095000 | 1.927413000  |
| C | 2.277645000  | 2.334888000  | -1.350713000 |
| C | 1.491787000  | 1.885894000  | 0.943143000  |
| C | 0.223401000  | 1.717344000  | 1.341697000  |
| C | -0.813689000 | 0.760116000  | 0.864958000  |
| C | -2.000186000 | 1.192823000  | 0.233795000  |
| C | -2.990241000 | 0.277927000  | -0.136002000 |
| C | -2.820455000 | -1.079033000 | 0.132880000  |
| C | -1.659988000 | -1.523020000 | 0.772838000  |
| C | -0.673482000 | -0.610680000 | 1.133831000  |
| C | -2.222223000 | 2.655307000  | -0.073659000 |
| F | -2.189510000 | 3.427536000  | 1.047697000  |
| F | -3.420253000 | 2.884919000  | -0.661057000 |
| F | -1.278179000 | 3.158052000  | -0.912961000 |
| C | -3.877621000 | -2.081345000 | -0.246913000 |
| F | -4.936552000 | -1.515281000 | -0.871963000 |
| F | -4.363361000 | -2.737309000 | 0.841198000  |
| F | -3.389785000 | -3.038671000 | -1.080001000 |
| H | 4.007924000  | -1.439140000 | -2.235530000 |
| H | 4.636904000  | 0.889672000  | -1.736860000 |
| H | 5.462529000  | -0.116542000 | -0.547572000 |
| H | 4.255163000  | 1.839512000  | 0.554564000  |
| H | 4.536259000  | -2.397648000 | -0.046453000 |
| H | 3.130320000  | 0.359892000  | 2.316400000  |
| H | 4.719618000  | -0.216171000 | 1.811160000  |
| H | 2.614585000  | -3.981243000 | 0.198786000  |
| H | 3.012866000  | -3.705916000 | -1.512296000 |
| H | 1.599383000  | -2.916951000 | -0.787238000 |
| H | 1.244474000  | 2.573649000  | -1.615109000 |
| H | 2.781250000  | 1.955110000  | -2.241505000 |
| H | 2.774683000  | 3.258508000  | -1.032853000 |
| H | 2.061102000  | 2.652308000  | 1.471210000  |
| H | -0.112733000 | 2.374947000  | 2.143124000  |
| H | -3.888685000 | 0.625082000  | -0.630193000 |
| H | -1.524197000 | -2.577964000 | 0.992560000  |
| H | 0.221817000  | -0.963557000 | 1.633520000  |

**Arteflene (5T), E= -1559.171682**

|   |             |              |              |
|---|-------------|--------------|--------------|
| C | 4.287757000 | 0.638153000  | 1.096116000  |
| C | 4.505991000 | -0.781177000 | 0.521525000  |
| C | 3.422099000 | -1.212879000 | -0.487312000 |
| C | 2.001728000 | -1.489166000 | 0.118816000  |
| O | 1.421957000 | -0.365346000 | 0.651263000  |
| O | 3.315652000 | 0.696013000  | 2.060441000  |
| C | 4.149280000 | 1.721142000  | -0.022722000 |
| C | 3.157464000 | 1.264079000  | -1.094819000 |
| C | 3.342146000 | -0.157113000 | -1.615980000 |
| C | 3.841595000 | 3.112707000  | 0.526825000  |
| O | 2.303425000 | 2.003955000  | -1.552704000 |
| C | 2.078240000 | -2.467830000 | 1.352496000  |



*Article submitted to Org. Biomol. Chem. 17 January 2011*

|   |              |              |              |
|---|--------------|--------------|--------------|
| C | 1.114710000  | -2.177462000 | -0.919081000 |
| C | -0.153257000 | -1.925961000 | -1.270111000 |
| C | -1.046425000 | -0.822219000 | -0.826933000 |
| C | -2.275491000 | -1.069653000 | -0.175651000 |
| C | -3.117534000 | -0.016198000 | 0.187333000  |
| C | -2.754540000 | 1.300104000  | -0.100397000 |
| C | -1.549695000 | 1.562831000  | -0.755553000 |
| C | -0.713716000 | 0.509780000  | -1.117891000 |
| C | -2.693787000 | -2.479735000 | 0.167916000  |
| F | -2.815854000 | -3.263740000 | -0.940283000 |
| F | -3.887775000 | -2.527196000 | 0.802513000  |
| F | -1.797719000 | -3.101851000 | 0.979446000  |
| C | -3.678906000 | 2.437484000  | 0.245181000  |
| F | -4.585420000 | 2.100282000  | 1.193837000  |
| F | -4.387521000 | 2.857332000  | -0.839659000 |
| F | -3.003287000 | 3.520710000  | 0.702406000  |
| H | 5.199830000  | 0.901995000  | 1.677657000  |
| H | 4.594926000  | -1.488226000 | 1.351695000  |
| H | 5.470462000  | -0.791302000 | -0.005115000 |
| H | 3.752498000  | -2.159818000 | -0.935826000 |
| H | 5.126678000  | 1.738271000  | -0.535220000 |
| H | 2.541386000  | -0.376375000 | -2.328060000 |
| H | 4.290621000  | -0.176919000 | -2.173530000 |
| H | 3.820044000  | 3.851284000  | -0.279423000 |
| H | 4.605709000  | 3.412514000  | 1.253835000  |
| H | 2.870337000  | 3.125022000  | 1.027408000  |
| H | 1.068394000  | -2.755778000 | 1.649343000  |
| H | 2.580078000  | -1.983530000 | 2.191829000  |
| H | 2.638873000  | -3.359155000 | 1.047696000  |
| H | 1.598506000  | -3.036109000 | -1.386103000 |
| H | -0.603900000 | -2.623357000 | -1.975459000 |
| H | -4.049459000 | -0.221957000 | 0.699228000  |
| H | -1.255687000 | 2.582832000  | -0.982656000 |
| H | 0.214658000  | 0.732490000  | -1.632182000 |

**10-deoxo-13-carbaartemisinin (6), E= -850.561864**

|   |              |              |              |
|---|--------------|--------------|--------------|
| O | -0.539313000 | -0.618732000 | -1.390670000 |
| O | -1.743167000 | -1.357452000 | -1.019375000 |
| C | -2.523309000 | -0.604123000 | -0.065367000 |
| C | -2.712827000 | 0.851526000  | -0.547003000 |
| C | -1.657707000 | 1.857687000  | -0.059109000 |
| C | -0.180645000 | 1.526513000  | -0.367444000 |
| C | 0.785762000  | 2.439136000  | 0.433348000  |
| C | 2.240557000  | 2.143511000  | 0.040423000  |
| C | 2.596680000  | 0.665881000  | 0.208277000  |
| C | 1.658461000  | -0.257782000 | -0.594337000 |
| C | 1.979435000  | -1.763851000 | -0.439924000 |
| C | 1.557908000  | -2.241753000 | 0.949466000  |
| O | 0.172777000  | -2.014272000 | 1.179261000  |
| C | -0.253397000 | -0.654849000 | 1.075706000  |
| C | 0.158096000  | 0.002641000  | -0.268257000 |
| C | -1.781968000 | -0.695470000 | 1.281571000  |
| C | -3.853348000 | -1.359344000 | -0.039090000 |
| C | 0.480473000  | 3.934928000  | 0.246290000  |
| C | 3.440620000  | -2.123484000 | -0.740202000 |
| H | -3.692529000 | 1.204021000  | -0.196742000 |
| H | -2.756524000 | 0.834252000  | -1.642402000 |
| H | -1.895129000 | 2.829027000  | -0.507902000 |
| H | -1.776411000 | 2.002233000  | 1.024153000  |
| H | -0.013611000 | 1.750410000  | -1.432641000 |
| H | 0.670467000  | 2.208911000  | 1.505425000  |
| H | 2.919844000  | 2.761781000  | 0.643177000  |

*Article submitted to Org. Biomol. Chem. 17 January 2011*

|   |              |              |              |
|---|--------------|--------------|--------------|
| H | 2.394419000  | 2.443238000  | -1.008005000 |
| H | 3.629120000  | 0.500274000  | -0.120961000 |
| H | 2.572350000  | 0.411988000  | 1.276673000  |
| H | 1.779573000  | 0.001524000  | -1.657691000 |
| H | 1.343190000  | -2.294819000 | -1.158252000 |
| H | 2.157617000  | -1.757083000 | 1.739828000  |
| H | 1.691717000  | -3.323949000 | 1.048710000  |
| H | 0.223922000  | -0.076674000 | 1.882977000  |
| H | -2.112867000 | 0.094485000  | 1.964377000  |
| H | -2.003764000 | -1.653444000 | 1.761783000  |
| H | -4.474983000 | -0.987487000 | 0.783915000  |
| H | -3.682671000 | -2.430297000 | 0.113287000  |
| H | -4.397770000 | -1.221655000 | -0.979597000 |
| H | 1.241266000  | 4.544045000  | 0.750048000  |
| H | -0.492548000 | 4.221403000  | 0.658124000  |
| H | 0.489745000  | 4.207240000  | -0.818047000 |
| H | 3.754133000  | -1.722584000 | -1.712372000 |
| H | 3.567636000  | -3.212507000 | -0.776177000 |
| H | 4.132707000  | -1.737693000 | 0.018492000  |

**10-deoxo-13-carbaartemisinin (6T), E= -850.515038**

|   |              |              |              |
|---|--------------|--------------|--------------|
| C | 0.124121000  | 1.327837000  | -0.910166000 |
| C | -0.339798000 | -0.000886000 | -0.133596000 |
| C | -1.904691000 | -0.102449000 | -0.237106000 |
| C | -2.566444000 | 1.150897000  | 0.348685000  |
| C | -2.106376000 | 2.418476000  | -0.383596000 |
| C | -0.575211000 | 2.604271000  | -0.377611000 |
| C | 0.304988000  | -1.264796000 | -0.796696000 |
| O | -0.191325000 | -2.434432000 | -0.146137000 |
| C | -2.371380000 | -1.430268000 | 0.402073000  |
| C | 1.656362000  | 1.487133000  | -1.080595000 |
| C | 2.580695000  | 0.984610000  | 0.041581000  |
| C | 2.655052000  | -0.567284000 | 0.248378000  |
| C | 1.841334000  | -1.381087000 | -0.793875000 |
| C | -0.055100000 | 3.131278000  | 0.969666000  |
| O | 2.319935000  | -0.918237000 | 1.543519000  |
| O | 0.045102000  | 0.131519000  | 1.163385000  |
| C | -3.881192000 | -1.675892000 | 0.268326000  |
| C | 4.142684000  | -1.030337000 | 0.144799000  |
| H | -0.295708000 | 1.152034000  | -1.911555000 |
| H | -2.150875000 | -0.149208000 | -1.312170000 |
| H | -2.333431000 | 1.215997000  | 1.418753000  |
| H | -3.656493000 | 1.069748000  | 0.265825000  |
| H | -2.584992000 | 3.304017000  | 0.055023000  |
| H | -2.452260000 | 2.364373000  | -1.427242000 |
| H | -0.347003000 | 3.378827000  | -1.127879000 |
| H | -0.046859000 | -1.281447000 | -1.845215000 |
| H | -2.106787000 | -1.404375000 | 1.469207000  |
| H | 1.853745000  | 2.558747000  | -1.222404000 |
| H | 1.957723000  | 1.016302000  | -2.024410000 |
| H | 2.283085000  | 1.410445000  | 1.003087000  |
| H | 3.586445000  | 1.369649000  | -0.173430000 |
| H | 2.219142000  | -1.133086000 | -1.793026000 |
| H | 2.058554000  | -2.440921000 | -0.628531000 |
| H | -0.584983000 | 4.054584000  | 1.235840000  |
| H | 1.012901000  | 3.370826000  | 0.925705000  |
| H | -0.199580000 | 2.406729000  | 1.777107000  |
| H | -4.146263000 | -2.671071000 | 0.647316000  |
| H | -4.202433000 | -1.623463000 | -0.781056000 |
| H | -4.468131000 | -0.946289000 | 0.834908000  |
| H | 4.230509000  | -2.102866000 | 0.341004000  |
| H | 4.758472000  | -0.485554000 | 0.866856000  |

Article submitted to *Org. Biomol. Chem.* 17 January 2011

|   |              |              |              |
|---|--------------|--------------|--------------|
| H | 4.512031000  | -0.819341000 | -0.865875000 |
| C | -1.600064000 | -2.588698000 | -0.239229000 |
| H | -1.825021000 | -3.535381000 | 0.262297000  |
| H | -1.891376000 | -2.686906000 | -1.302504000 |

**13-carbaartemisinin (7), E= -924.614673**

|   |              |              |              |
|---|--------------|--------------|--------------|
| C | -0.959328000 | 1.231219000  | 0.977868000  |
| C | 0.041138000  | 0.240707000  | 0.309535000  |
| C | 1.474535000  | 0.828693000  | 0.258586000  |
| C | 1.492881000  | 2.232500000  | -0.371139000 |
| C | 0.530443000  | 3.183393000  | 0.350408000  |
| C | -0.919404000 | 2.663191000  | 0.363354000  |
| C | 0.081653000  | -1.085818000 | 1.091135000  |
| O | 1.191814000  | -1.952253000 | 0.747718000  |
| C | 2.340263000  | -1.567919000 | 0.133660000  |
| C | 2.427131000  | -0.158502000 | -0.445870000 |
| C | -2.398602000 | 0.664736000  | 1.092728000  |
| C | -2.887712000 | -0.279821000 | -0.023750000 |
| C | -1.993196000 | -1.510869000 | -0.299467000 |
| C | -1.187291000 | -1.951798000 | 0.932834000  |
| C | -1.603119000 | 2.844526000  | -1.004874000 |
| O | -1.018702000 | -1.224596000 | -1.331959000 |
| O | -0.364737000 | 0.055318000  | -1.073145000 |
| C | 3.893477000  | 0.302143000  | -0.476668000 |
| C | -2.797927000 | -2.663835000 | -0.901315000 |
| O | 3.226310000  | -2.387453000 | 0.033046000  |
| H | -0.590694000 | 1.366619000  | 2.006813000  |
| H | 1.799497000  | 0.933635000  | 1.307660000  |
| H | 1.236140000  | 2.157074000  | -1.435879000 |
| H | 2.507673000  | 2.641276000  | -0.322053000 |
| H | 0.564334000  | 4.176848000  | -0.115766000 |
| H | 0.875689000  | 3.314619000  | 1.387452000  |
| H | -1.481955000 | 3.289065000  | 1.073116000  |
| H | 0.232890000  | -0.823972000 | 2.144849000  |
| H | 2.075851000  | -0.267112000 | -1.482304000 |
| H | -3.099432000 | 1.506933000  | 1.160767000  |
| H | -2.495000000 | 0.138087000  | 2.050455000  |
| H | -3.015666000 | 0.252354000  | -0.971739000 |
| H | -3.881292000 | -0.644232000 | 0.269655000  |
| H | -1.802130000 | -1.916248000 | 1.838471000  |
| H | -0.854895000 | -2.986048000 | 0.806923000  |
| H | -1.581533000 | 3.905946000  | -1.282969000 |
| H | -2.655440000 | 2.541603000  | -0.973483000 |
| H | -1.119377000 | 2.271147000  | -1.799082000 |
| H | 4.525340000  | -0.488792000 | -0.886370000 |
| H | 4.258324000  | 0.533646000  | 0.532201000  |
| H | 4.012441000  | 1.194691000  | -1.097569000 |
| H | -2.129028000 | -3.449275000 | -1.268312000 |
| H | -3.416818000 | -2.313569000 | -1.734188000 |
| H | -3.452065000 | -3.097694000 | -0.136084000 |

**13-carbaartemisinin (7T), E= -924.569886**

|   |              |              |              |
|---|--------------|--------------|--------------|
| C | 0.549011000  | 1.468244000  | -0.862747000 |
| C | -0.212001000 | 0.232977000  | -0.170538000 |
| C | -1.756819000 | 0.445162000  | -0.309152000 |
| C | -2.189449000 | 1.803657000  | 0.257652000  |
| C | -1.446706000 | 2.962958000  | -0.417179000 |
| C | 0.086308000  | 2.839496000  | -0.314495000 |
| C | 0.159571000  | -1.075847000 | -0.914587000 |
| O | -0.605155000 | -2.198220000 | -0.401293000 |
| C | -1.892900000 | -2.114020000 | 0.018391000  |

*Article submitted to Org. Biomol. Chem. 17 January 2011*

|   |              |              |              |
|---|--------------|--------------|--------------|
| C | -2.480207000 | -0.741094000 | 0.367315000  |
| C | 2.092445000  | 1.318212000  | -0.933885000 |
| C | 2.806409000  | 0.538677000  | 0.183991000  |
| C | 2.555714000  | -1.009732000 | 0.230247000  |
| C | 1.630334000  | -1.531368000 | -0.902282000 |
| C | 0.615767000  | 3.206584000  | 1.082162000  |
| O | 2.108958000  | -1.408392000 | 1.475486000  |
| O | 0.138679000  | 0.211692000  | 1.142161000  |
| C | -3.998491000 | -0.749867000 | 0.130554000  |
| C | 3.919673000  | -1.759771000 | 0.100264000  |
| O | -2.507855000 | -3.144766000 | 0.178501000  |
| H | 0.164293000  | 1.412019000  | -1.892006000 |
| H | -1.986430000 | 0.427951000  | -1.387078000 |
| H | -2.013912000 | 1.813591000  | 1.340633000  |
| H | -3.267070000 | 1.936520000  | 0.111410000  |
| H | -1.768745000 | 3.918073000  | 0.017142000  |
| H | -1.730708000 | 2.993643000  | -1.480100000 |
| H | 0.511617000  | 3.574691000  | -1.016612000 |
| H | -0.152814000 | -0.952288000 | -1.960498000 |
| H | -2.300722000 | -0.649701000 | 1.450840000  |
| H | 2.513694000  | 2.332126000  | -0.953931000 |
| H | 2.362314000  | 0.880175000  | -1.902546000 |
| H | 2.520711000  | 0.931945000  | 1.163701000  |
| H | 3.882562000  | 0.725959000  | 0.075243000  |
| H | 2.083617000  | -1.273991000 | -1.866380000 |
| H | 1.612663000  | -2.623781000 | -0.845086000 |
| H | 0.278473000  | 4.214454000  | 1.353969000  |
| H | 1.710913000  | 3.212070000  | 1.110422000  |
| H | 0.269758000  | 2.508412000  | 1.850212000  |
| H | -4.443455000 | -1.642956000 | 0.574602000  |
| H | -4.228228000 | -0.758718000 | -0.942680000 |
| H | -4.472080000 | 0.130592000  | 0.574632000  |
| H | 3.778104000  | -2.841296000 | 0.179483000  |
| H | 4.605207000  | -1.431875000 | 0.887180000  |
| H | 4.361266000  | -1.525742000 | -0.875649000 |

**OZ277 fragment (8m), E= -849.412360**

|   |              |              |              |
|---|--------------|--------------|--------------|
| H | 5.729557000  | -0.075851000 | -0.292259000 |
| C | 4.757558000  | 0.055106000  | 0.200757000  |
| H | 4.968922000  | 0.298898000  | 1.253484000  |
| C | 3.990822000  | 1.219139000  | -0.446727000 |
| H | 3.888460000  | 1.035533000  | -1.524974000 |
| H | 4.551499000  | 2.156442000  | -0.338974000 |
| C | 2.593886000  | 1.389110000  | 0.175409000  |
| H | 2.017671000  | 2.168002000  | -0.335701000 |
| H | 2.686323000  | 1.688226000  | 1.227904000  |
| C | 1.786134000  | 0.090873000  | 0.155579000  |
| C | 2.554281000  | -1.088361000 | 0.762712000  |
| H | 1.956814000  | -1.997220000 | 0.636286000  |
| H | 2.644253000  | -0.903745000 | 1.841805000  |
| C | 3.947360000  | -1.249020000 | 0.131071000  |
| H | 4.486062000  | -2.061909000 | 0.634583000  |
| H | 3.831892000  | -1.550202000 | -0.919009000 |
| O | 0.528490000  | 0.266156000  | 0.815697000  |
| O | 1.420266000  | -0.167397000 | -1.212501000 |
| O | 0.212115000  | -0.966098000 | -1.043085000 |
| C | -0.504037000 | -0.198226000 | -0.063201000 |
| C | -1.475844000 | -1.142053000 | 0.663808000  |
| H | -0.891884000 | -1.963760000 | 1.094713000  |
| C | -2.517478000 | -1.680291000 | -0.343982000 |
| H | -3.202928000 | -2.360610000 | 0.180751000  |
| H | -2.023122000 | -2.265943000 | -1.129061000 |

*Article submitted to Org. Biomol. Chem. 17 January 2011*

|   |              |              |              |
|---|--------------|--------------|--------------|
| C | -3.301421000 | -0.503191000 | -0.963198000 |
| H | -4.039060000 | -0.891347000 | -1.678546000 |
| C | -4.020594000 | 0.281748000  | 0.154544000  |
| H | -4.739807000 | -0.370250000 | 0.671144000  |
| H | -4.596339000 | 1.111898000  | -0.279484000 |
| C | -2.983173000 | 0.826973000  | 1.159376000  |
| H | -3.494835000 | 1.383335000  | 1.956450000  |
| C | -1.994980000 | 1.761702000  | 0.428550000  |
| H | -1.263561000 | 2.170014000  | 1.136595000  |
| H | -2.532095000 | 2.614033000  | -0.010562000 |
| C | -1.273685000 | 0.981167000  | -0.692434000 |
| H | -0.554383000 | 1.627212000  | -1.208153000 |
| C | -2.196023000 | -0.348307000 | 1.777979000  |
| H | -1.466277000 | 0.020588000  | 2.508771000  |
| H | -2.877494000 | -1.025230000 | 2.311963000  |
| C | -2.313609000 | 0.431121000  | -1.694053000 |
| H | -2.854315000 | 1.271777000  | -2.150681000 |
| H | -1.807502000 | -0.106114000 | -2.505071000 |

**OZ277 fragment (8m-T), E= -849.381020**

|   |              |              |              |
|---|--------------|--------------|--------------|
| H | -5.841628000 | 0.117566000  | -0.117428000 |
| C | -4.794556000 | 0.169119000  | -0.442308000 |
| H | -4.809821000 | 0.375927000  | -1.523619000 |
| C | -4.074257000 | 1.314369000  | 0.284351000  |
| H | -4.173173000 | 1.183685000  | 1.369240000  |
| H | -4.544208000 | 2.275746000  | 0.035398000  |
| C | -2.592188000 | 1.386806000  | -0.086011000 |
| H | -2.070048000 | 2.165282000  | 0.478887000  |
| H | -2.455848000 | 1.597597000  | -1.153379000 |
| C | -1.831619000 | 0.024641000  | 0.172652000  |
| C | -2.612268000 | -1.125243000 | -0.569543000 |
| H | -2.098834000 | -2.060854000 | -0.337583000 |
| H | -2.487658000 | -0.920728000 | -1.640429000 |
| C | -4.094346000 | -1.174457000 | -0.191673000 |
| H | -4.580154000 | -1.967403000 | -0.776614000 |
| H | -4.193739000 | -1.453789000 | 0.864875000  |
| O | -0.541720000 | 0.213865000  | -0.442003000 |
| O | -1.809324000 | -0.196540000 | 1.479981000  |
| O | 0.268032000  | -1.784109000 | 0.425377000  |
| C | 0.567861000  | -0.578535000 | 0.016632000  |
| C | 1.594796000  | -0.647044000 | -1.217021000 |
| H | 1.058272000  | -1.178089000 | -2.010561000 |
| C | 2.854128000  | -1.416698000 | -0.785658000 |
| H | 3.522674000  | -1.501811000 | -1.654726000 |
| H | 2.592880000  | -2.433411000 | -0.474205000 |
| C | 3.570361000  | -0.667331000 | 0.357151000  |
| H | 4.474365000  | -1.220340000 | 0.645162000  |
| C | 3.953884000  | 0.751522000  | -0.115676000 |
| H | 4.648672000  | 0.691933000  | -0.965890000 |
| H | 4.479351000  | 1.287607000  | 0.687744000  |
| C | 2.681591000  | 1.524612000  | -0.524865000 |
| H | 2.950283000  | 2.534931000  | -0.861179000 |
| C | 1.725732000  | 1.619622000  | 0.681552000  |
| H | 0.824411000  | 2.181730000  | 0.416005000  |
| H | 2.213722000  | 2.157934000  | 1.507757000  |
| C | 1.356083000  | 0.215265000  | 1.183577000  |
| H | 0.644452000  | 0.264927000  | 2.011744000  |
| C | 1.964904000  | 0.776173000  | -1.666452000 |
| H | 1.071280000  | 1.321032000  | -1.986914000 |
| H | 2.630183000  | 0.694971000  | -2.538837000 |
| C | 2.619189000  | -0.568334000 | 1.568453000  |
| H | 3.119402000  | -0.040956000 | 2.393936000  |

Article submitted to *Org. Biomol. Chem.* 17 January 2011

H 2.353506000 -1.566133000 1.932816000

**RKA216 fragment (9m), E= -924.544638**

|   |              |              |              |
|---|--------------|--------------|--------------|
| H | -5.671917000 | 0.732946000  | 0.871945000  |
| C | -4.857911000 | 0.351267000  | 0.241351000  |
| H | -5.314370000 | 0.050579000  | -0.714565000 |
| C | -4.203654000 | -0.873402000 | 0.897039000  |
| H | -3.807502000 | -0.593351000 | 1.881463000  |
| H | -4.939031000 | -1.670448000 | 1.064319000  |
| C | -3.056794000 | -1.418387000 | 0.026602000  |
| H | -2.549400000 | -2.262145000 | 0.506789000  |
| H | -3.449959000 | -1.772513000 | -0.934849000 |
| C | -2.022981000 | -0.333292000 | -0.294864000 |
| C | -2.658674000 | 0.927418000  | -0.893431000 |
| H | -3.030383000 | 0.654782000  | -1.889482000 |
| H | -1.894942000 | 1.695675000  | -1.030371000 |
| C | -3.813441000 | 1.447256000  | -0.019067000 |
| H | -4.276558000 | 2.313769000  | -0.508006000 |
| H | -3.408188000 | 1.801894000  | 0.937753000  |
| C | 0.679024000  | 0.217072000  | -0.200121000 |
| C | 1.760728000  | 1.273628000  | -0.509691000 |
| H | 1.267040000  | 2.153385000  | -0.939588000 |
| C | 2.491233000  | 1.645437000  | 0.802608000  |
| H | 1.792086000  | 2.094307000  | 1.517283000  |
| H | 3.254073000  | 2.402389000  | 0.574336000  |
| C | 3.148147000  | 0.386271000  | 1.407134000  |
| H | 3.664782000  | 0.656762000  | 2.338197000  |
| C | 2.054475000  | -0.660917000 | 1.707731000  |
| H | 2.505534000  | -1.563045000 | 2.143366000  |
| H | 1.338810000  | -0.270704000 | 2.440715000  |
| C | 1.323875000  | -1.048614000 | 0.401949000  |
| H | 0.543744000  | -1.784586000 | 0.610495000  |
| C | 2.338757000  | -1.623284000 | -0.611844000 |
| H | 1.826107000  | -1.912544000 | -1.536744000 |
| H | 2.785725000  | -2.534239000 | -0.190822000 |
| C | 3.434911000  | -0.578069000 | -0.908869000 |
| H | 4.156317000  | -0.992727000 | -1.626180000 |
| C | 2.775335000  | 0.678673000  | -1.514418000 |
| H | 2.277543000  | 0.432061000  | -2.459128000 |
| H | 3.533680000  | 1.441747000  | -1.737124000 |
| C | 4.160563000  | -0.201320000 | 0.400733000  |
| H | 4.646039000  | -1.089099000 | 0.830677000  |
| H | 4.956533000  | 0.528804000  | 0.195175000  |
| O | -1.093807000 | -0.961740000 | -1.183003000 |
| O | -0.001200000 | -0.019443000 | -1.436181000 |
| O | -0.251080000 | 0.855854000  | 0.683075000  |
| O | -1.344827000 | -0.081186000 | 0.943270000  |

**RKA216 fragment (9m-T), E= -924.511339**

|   |              |              |              |
|---|--------------|--------------|--------------|
| H | -6.099561000 | 0.644430000  | 0.110239000  |
| C | -5.132154000 | 0.311177000  | -0.286728000 |
| H | -5.289680000 | 0.085177000  | -1.352637000 |
| C | -4.676357000 | -0.963006000 | 0.440314000  |
| H | -4.648992000 | -0.783531000 | 1.522188000  |
| H | -5.395240000 | -1.775525000 | 0.269617000  |
| C | -3.297329000 | -1.428493000 | -0.036479000 |
| H | -2.945109000 | -2.297190000 | 0.528515000  |
| H | -3.317136000 | -1.703112000 | -1.097861000 |
| C | -2.212666000 | -0.292798000 | 0.081600000  |
| C | -2.705656000 | 0.994002000  | -0.643107000 |
| H | -2.721239000 | 0.760074000  | -1.714926000 |

*Article submitted to Org. Biomol. Chem. 17 January 2011*

|   |              |              |              |
|---|--------------|--------------|--------------|
| H | -1.962139000 | 1.776879000  | -0.481721000 |
| C | -4.090089000 | 1.431340000  | -0.152825000 |
| H | -4.405071000 | 2.311486000  | -0.728961000 |
| H | -4.020337000 | 1.747434000  | 0.895693000  |
| C | 0.833408000  | 0.449431000  | 0.057057000  |
| C | 2.009353000  | 1.213411000  | -0.711604000 |
| H | 1.549788000  | 2.083248000  | -1.193077000 |
| C | 3.068616000  | 1.646337000  | 0.318799000  |
| H | 2.631572000  | 2.326636000  | 1.057142000  |
| H | 3.858081000  | 2.199566000  | -0.209443000 |
| C | 3.668282000  | 0.404641000  | 1.012374000  |
| H | 4.429252000  | 0.725171000  | 1.736322000  |
| C | 2.548645000  | -0.361151000 | 1.747754000  |
| H | 2.967877000  | -1.246294000 | 2.247072000  |
| H | 2.097076000  | 0.266009000  | 2.523503000  |
| C | 1.478547000  | -0.827087000 | 0.744006000  |
| H | 0.662143000  | -1.344756000 | 1.253585000  |
| C | 2.110486000  | -1.723114000 | -0.336055000 |
| H | 1.348201000  | -2.063361000 | -1.044535000 |
| H | 2.516769000  | -2.617613000 | 0.158263000  |
| C | 3.238071000  | -0.964920000 | -1.065108000 |
| H | 3.691862000  | -1.620256000 | -1.820420000 |
| C | 2.636556000  | 0.273569000  | -1.758144000 |
| H | 1.893684000  | -0.022531000 | -2.505121000 |
| H | 3.424674000  | 0.833068000  | -2.283465000 |
| C | 4.309864000  | -0.518075000 | -0.046526000 |
| H | 4.756720000  | -1.396633000 | 0.440353000  |
| H | 5.124986000  | 0.008444000  | -0.563851000 |
| O | -1.066959000 | -0.890518000 | -0.581043000 |
| O | -0.086717000 | 0.102907000  | -1.006541000 |
| O | 0.304062000  | 1.260675000  | 0.958844000  |
| O | -2.009592000 | -0.069115000 | 1.386434000  |

**RKA216 fragment (9m-T2), E= -924.511193**

|   |              |              |              |
|---|--------------|--------------|--------------|
| H | -5.051074000 | -2.043435000 | 0.377516000  |
| C | -4.616300000 | -1.039459000 | 0.291530000  |
| H | -5.431070000 | -0.325369000 | 0.486885000  |
| C | -4.078552000 | -0.823315000 | -1.130418000 |
| H | -3.364370000 | -1.616237000 | -1.381252000 |
| H | -4.897681000 | -0.883975000 | -1.860143000 |
| C | -3.398803000 | 0.542632000  | -1.292581000 |
| H | -2.940608000 | 0.647393000  | -2.281256000 |
| H | -4.118842000 | 1.358317000  | -1.166840000 |
| C | -2.272633000 | 0.768446000  | -0.215186000 |
| C | -2.838993000 | 0.523641000  | 1.214330000  |
| H | -3.560161000 | 1.326919000  | 1.404499000  |
| H | -2.015494000 | 0.638668000  | 1.922108000  |
| C | -3.509694000 | -0.848361000 | 1.339359000  |
| H | -3.927221000 | -0.940845000 | 2.350947000  |
| H | -2.753240000 | -1.635302000 | 1.232790000  |
| C | 0.798627000  | 0.397826000  | 0.456538000  |
| C | 1.881468000  | -0.351232000 | 1.364690000  |
| H | 1.434560000  | -0.454589000 | 2.359313000  |
| C | 2.191386000  | -1.731902000 | 0.755398000  |
| H | 1.292524000  | -2.355222000 | 0.732977000  |
| H | 2.921472000  | -2.231077000 | 1.409539000  |
| C | 2.777546000  | -1.565709000 | -0.660973000 |
| H | 3.002619000  | -2.555513000 | -1.079957000 |
| C | 1.740314000  | -0.852845000 | -1.553064000 |
| H | 2.141628000  | -0.729145000 | -2.569486000 |
| H | 0.825457000  | -1.448171000 | -1.638899000 |
| C | 1.425957000  | 0.544735000  | -0.990376000 |

*Article submitted to Org. Biomol. Chem. 17 January 2011*

|   |              |              |              |
|---|--------------|--------------|--------------|
| H | 0.675190000  | 1.052492000  | -1.600722000 |
| C | 2.713949000  | 1.382632000  | -0.894759000 |
| H | 2.491324000  | 2.382411000  | -0.507000000 |
| H | 3.121773000  | 1.509419000  | -1.907684000 |
| C | 3.747456000  | 0.668838000  | 0.001543000  |
| H | 4.664091000  | 1.271132000  | 0.055772000  |
| C | 3.160246000  | 0.504281000  | 1.419553000  |
| H | 2.949782000  | 1.481943000  | 1.865567000  |
| H | 3.886119000  | -0.003519000 | 2.070501000  |
| C | 4.068223000  | -0.721691000 | -0.589091000 |
| H | 4.503707000  | -0.612499000 | -1.592632000 |
| H | 4.819346000  | -1.232150000 | 0.030781000  |
| O | -1.839153000 | 2.027466000  | -0.350618000 |
| O | 0.527959000  | 1.578848000  | 0.988849000  |
| O | -0.335419000 | -0.507351000 | 0.478975000  |
| O | -1.279764000 | -0.223059000 | -0.593741000 |

**IRON-HEME COMPLEXES (high spin)**

**Fe(III)-heme-dioxane, E= -2558.331507**

|    |              |              |              |
|----|--------------|--------------|--------------|
| O  | 2.745717000  | -0.427561000 | 1.672797000  |
| C  | 2.768688000  | 0.257442000  | 2.850061000  |
| C  | 1.994536000  | -0.382154000 | 4.010190000  |
| C  | 0.468044000  | -0.255842000 | 3.929780000  |
| C  | -0.176646000 | -0.818560000 | 2.658935000  |
| O  | 0.115686000  | -0.025535000 | 1.551725000  |
| Fe | -0.220111000 | 0.046746000  | -0.237121000 |
| N  | -2.281283000 | -0.429403000 | -0.308998000 |
| C  | -3.313606000 | 0.444054000  | -0.073654000 |
| C  | -4.547162000 | -0.292052000 | 0.096787000  |
| C  | -4.240474000 | -1.616346000 | -0.043174000 |
| C  | -2.818797000 | -1.692014000 | -0.299072000 |
| C  | -3.202758000 | 1.836267000  | -0.033841000 |
| C  | -2.042349000 | 2.580937000  | -0.260392000 |
| C  | -1.976489000 | 4.026441000  | -0.273797000 |
| C  | -0.683417000 | 4.359813000  | -0.562587000 |
| C  | 0.041648000  | 3.118128000  | -0.726084000 |
| N  | -0.805434000 | 2.057616000  | -0.535098000 |
| C  | 1.396323000  | 3.019744000  | -1.055711000 |
| C  | 2.107235000  | 1.838121000  | -1.279372000 |
| C  | 3.496171000  | 1.771578000  | -1.681814000 |
| C  | 3.801724000  | 0.448467000  | -1.822934000 |
| C  | 2.600862000  | -0.293894000 | -1.507011000 |
| N  | 1.590554000  | 0.572544000  | -1.183220000 |
| H  | -0.250440000 | 5.353796000  | -0.668218000 |
| H  | -2.820614000 | 4.691226000  | -0.094683000 |
| H  | -5.520630000 | 0.158039000  | 0.287578000  |
| H  | -4.911229000 | -2.473024000 | 0.009614000  |
| C  | -2.108396000 | -2.873461000 | -0.527908000 |
| C  | -0.749819000 | -2.971741000 | -0.839180000 |
| C  | -0.055342000 | -4.204153000 | -1.142099000 |
| C  | 1.237723000  | -3.868612000 | -1.429231000 |
| C  | 1.336114000  | -2.431103000 | -1.302335000 |
| N  | 0.118556000  | -1.914115000 | -0.937980000 |
| H  | -0.511696000 | -5.193250000 | -1.143452000 |
| H  | 2.057773000  | -4.526674000 | -1.713730000 |
| C  | 2.489734000  | -1.684839000 | -1.552624000 |
| H  | 4.749756000  | 0.002553000  | -2.120846000 |
| H  | 4.141487000  | 2.634547000  | -1.841296000 |
| H  | 1.944627000  | 3.956562000  | -1.174982000 |
| H  | -4.117605000 | 2.397620000  | 0.167278000  |
| H  | -2.674686000 | -3.806258000 | -0.487826000 |



*Article submitted to Org. Biomol. Chem. 17 January 2011*

|   |              |              |              |
|---|--------------|--------------|--------------|
| H | 3.386057000  | -2.242244000 | -1.832076000 |
| H | 0.169424000  | -1.859891000 | 2.493681000  |
| H | -1.275069000 | -0.867819000 | 2.807919000  |
| H | 0.024332000  | -0.772059000 | 4.799863000  |
| H | 0.173387000  | 0.805748000  | 4.012633000  |
| H | 2.339020000  | 0.074970000  | 4.955196000  |
| H | 2.281877000  | -1.448069000 | 4.051211000  |
| H | 2.491540000  | 1.326066000  | 2.705524000  |
| H | 3.856325000  | 0.293709000  | 3.115051000  |

**Fe(III)-heme-trioxane 1, E= -2594.227388**

|    |              |              |              |
|----|--------------|--------------|--------------|
| N  | 0.868529000  | -1.384893000 | -1.218552000 |
| C  | 0.671366000  | -2.743080000 | -1.237413000 |
| C  | 1.853102000  | -3.401090000 | -1.750510000 |
| C  | 2.758046000  | -2.419733000 | -2.041296000 |
| C  | 2.131348000  | -1.159411000 | -1.707830000 |
| C  | -0.501880000 | -3.394433000 | -0.847111000 |
| C  | -1.678571000 | -2.783299000 | -0.404856000 |
| N  | -1.860973000 | -1.432004000 | -0.254761000 |
| C  | -3.154082000 | -1.248284000 | 0.165943000  |
| C  | -3.812818000 | -2.530282000 | 0.292202000  |
| C  | -2.898518000 | -3.481813000 | -0.062284000 |
| Fe | -0.339141000 | 0.031699000  | -0.222204000 |
| N  | 0.848742000  | 1.514406000  | -1.145422000 |
| C  | 0.632201000  | 2.867028000  | -1.086242000 |
| C  | 1.804779000  | 3.570839000  | -1.559302000 |
| C  | 2.724145000  | 2.620674000  | -1.903890000 |
| C  | 2.114246000  | 1.334545000  | -1.642713000 |
| C  | -3.757826000 | -0.011633000 | 0.407897000  |
| C  | -3.170345000 | 1.244687000  | 0.234489000  |
| C  | -3.845917000 | 2.508873000  | 0.433696000  |
| C  | -2.944813000 | 3.489973000  | 0.131382000  |
| C  | -1.717025000 | 2.826704000  | -0.251932000 |
| N  | -1.882172000 | 1.467576000  | -0.178297000 |
| C  | -0.549916000 | 3.478105000  | -0.659644000 |
| C  | 2.716625000  | 0.096801000  | -1.888233000 |
| O  | 0.270356000  | -0.045769000 | 1.490363000  |
| C  | 0.744273000  | -0.985310000 | 2.395833000  |
| C  | 1.302110000  | -0.319460000 | 3.656289000  |
| H  | -3.089814000 | 4.569238000  | 0.154406000  |
| H  | -4.880910000 | 2.619300000  | 0.754612000  |
| H  | -4.847124000 | -2.672026000 | 0.602984000  |
| H  | -3.030527000 | -4.562337000 | -0.100837000 |
| H  | 1.962579000  | -4.477477000 | -1.876073000 |
| H  | 3.760562000  | -2.527771000 | -2.453025000 |
| H  | 3.724057000  | 2.765986000  | -2.310720000 |
| H  | 1.898025000  | 4.654123000  | -1.624297000 |
| H  | -0.571253000 | 4.569786000  | -0.666829000 |
| H  | -4.797859000 | -0.027577000 | 0.740237000  |
| H  | -0.508054000 | -4.484052000 | -0.917807000 |
| H  | 3.732798000  | 0.113222000  | -2.287507000 |
| H  | 1.527170000  | -1.616261000 | 1.929715000  |
| H  | -0.060920000 | -1.677870000 | 2.719977000  |
| H  | 1.735762000  | -1.109068000 | 4.299925000  |
| H  | 0.484636000  | 0.166859000  | 4.210002000  |
| O  | 2.245325000  | 0.712258000  | 3.414241000  |
| C  | 3.245803000  | 0.458858000  | 2.475209000  |
| H  | 3.950360000  | 1.323775000  | 2.538013000  |
| O  | 3.883814000  | -0.698912000 | 2.509609000  |
| H  | 2.815351000  | 0.536193000  | 1.431942000  |

**Fe(III)-heme-trioxane 2, E= -2594.223271**

Article submitted to *Org. Biomol. Chem.* 17 January 2011

|    |              |              |              |
|----|--------------|--------------|--------------|
| O  | 2.816895000  | -0.294245000 | 1.700243000  |
| C  | 2.722962000  | 0.232898000  | 2.951315000  |
| C  | 1.843304000  | -0.548495000 | 3.939772000  |
| O  | 0.464021000  | -0.294070000 | 3.824329000  |
| C  | -0.161645000 | -0.787536000 | 2.668715000  |
| O  | 0.133770000  | -0.038371000 | 1.551778000  |
| Fe | -0.220679000 | 0.052418000  | -0.237989000 |
| N  | -2.306636000 | -0.291136000 | -0.296470000 |
| C  | -3.278700000 | 0.649514000  | -0.061220000 |
| C  | -4.556427000 | -0.003078000 | 0.120263000  |
| C  | -4.338143000 | -1.345402000 | -0.013623000 |
| C  | -2.926210000 | -1.515840000 | -0.276051000 |
| C  | -3.076964000 | 2.031631000  | -0.031679000 |
| C  | -1.871873000 | 2.696807000  | -0.270011000 |
| C  | -1.711420000 | 4.134454000  | -0.294334000 |
| C  | -0.401012000 | 4.380376000  | -0.592032000 |
| C  | 0.240596000  | 3.093137000  | -0.749512000 |
| N  | -0.673141000 | 2.091375000  | -0.547191000 |
| C  | 1.584667000  | 2.903884000  | -1.081403000 |
| C  | 2.216141000  | 1.676542000  | -1.294445000 |
| C  | 3.597762000  | 1.516050000  | -1.693811000 |
| C  | 3.817347000  | 0.174866000  | -1.821714000 |
| C  | 2.570779000  | -0.485124000 | -1.501162000 |
| N  | 1.617446000  | 0.448182000  | -1.188362000 |
| H  | 0.095861000  | 5.342999000  | -0.705970000 |
| H  | -2.509051000 | 4.854110000  | -0.114521000 |
| H  | -5.496942000 | 0.511021000  | 0.314257000  |
| H  | -5.063164000 | -2.155962000 | 0.048394000  |
| C  | -2.296057000 | -2.742548000 | -0.499373000 |
| C  | -0.947642000 | -2.931445000 | -0.811836000 |
| C  | -0.335747000 | -4.208540000 | -1.105469000 |
| C  | 0.976812000  | -3.961074000 | -1.393891000 |
| C  | 1.169723000  | -2.532679000 | -1.277807000 |
| N  | -0.011378000 | -1.933211000 | -0.917747000 |
| H  | -0.856300000 | -5.165371000 | -1.099942000 |
| H  | 1.751741000  | -4.673760000 | -1.673174000 |
| C  | 2.370047000  | -1.866056000 | -1.532665000 |
| H  | 4.735134000  | -0.334363000 | -2.112614000 |
| H  | 4.297984000  | 2.333911000  | -1.858913000 |
| H  | 2.193114000  | 3.801609000  | -1.208784000 |
| H  | -3.951637000 | 2.652991000  | 0.171369000  |
| H  | -2.922203000 | -3.635868000 | -0.451777000 |
| H  | 3.228150000  | -2.483328000 | -1.806191000 |
| H  | 0.136075000  | -1.848665000 | 2.507950000  |
| H  | -1.246279000 | -0.751295000 | 2.887287000  |
| H  | 2.115007000  | -0.261020000 | 4.968961000  |
| H  | 2.063423000  | -1.628390000 | 3.808998000  |
| H  | 2.442186000  | 1.308985000  | 2.943707000  |
| H  | 3.773217000  | 0.202486000  | 3.338118000  |

**Fe(III)-heme-tetraoxane, E= -2630.051387**

|   |              |              |              |
|---|--------------|--------------|--------------|
| N | -0.734177000 | -1.961229000 | -0.607011000 |
| C | -1.892863000 | -2.663147000 | -0.384184000 |
| C | -1.659236000 | -4.073898000 | -0.602002000 |
| C | -0.349407000 | -4.206586000 | -0.967328000 |
| C | 0.221222000  | -2.877626000 | -0.971925000 |
| C | -3.124675000 | -2.101460000 | -0.040379000 |
| C | -3.401115000 | -0.738455000 | 0.094412000  |
| N | -2.491080000 | 0.274367000  | -0.062169000 |
| C | -3.169377000 | 1.450744000  | 0.130265000  |
| C | -4.561111000 | 1.172758000  | 0.414993000  |

*Article submitted to Org. Biomol. Chem. 17 January 2011*

|    |              |              |              |
|----|--------------|--------------|--------------|
| C  | -4.704710000 | -0.185076000 | 0.393535000  |
| Fe | -0.386369000 | 0.051283000  | -0.067730000 |
| N  | 1.442115000  | -0.126005000 | -1.108863000 |
| C  | 2.335082000  | 0.892365000  | -1.326363000 |
| C  | 3.599434000  | 0.348543000  | -1.770095000 |
| C  | 3.451229000  | -1.009296000 | -1.815217000 |
| C  | 2.095741000  | -1.295698000 | -1.398256000 |
| C  | -2.611206000 | 2.727843000  | 0.048595000  |
| C  | -1.282751000 | 3.029620000  | -0.264684000 |
| C  | -0.748369000 | 4.367463000  | -0.397935000 |
| C  | 0.567495000  | 4.234314000  | -0.739066000 |
| C  | 0.837853000  | 2.815480000  | -0.816034000 |
| N  | -0.300041000 | 2.109073000  | -0.518873000 |
| C  | 2.063271000  | 2.255023000  | -1.176847000 |
| C  | 1.537388000  | -2.573943000 | -1.324494000 |
| O  | -0.013361000 | -0.067469000 | 1.716507000  |
| C  | 0.472830000  | -0.943545000 | 2.639278000  |
| O  | 1.786234000  | -0.665327000 | 3.074063000  |
| O  | 2.689364000  | -1.032353000 | 1.994169000  |
| C  | 3.674400000  | -0.033108000 | 1.931133000  |
| O  | 3.320560000  | 1.176847000  | 1.508710000  |
| H  | 1.297406000  | 5.019167000  | -0.932600000 |
| H  | -1.319225000 | 5.284021000  | -0.255196000 |
| H  | -5.322985000 | 1.929171000  | 0.598889000  |
| H  | -5.608637000 | -0.770827000 | 0.555585000  |
| H  | -2.412751000 | -4.853649000 | -0.498653000 |
| H  | 0.190258000  | -5.117327000 | -1.223707000 |
| H  | 4.182556000  | -1.758878000 | -2.115051000 |
| H  | 4.477558000  | 0.941401000  | -2.022631000 |
| H  | 2.883379000  | 2.946294000  | -1.379013000 |
| H  | -3.280558000 | 3.572011000  | 0.226371000  |
| H  | -3.957518000 | -2.791723000 | 0.108693000  |
| H  | 2.184430000  | -3.412673000 | -1.588967000 |
| H  | 0.433811000  | -1.990580000 | 2.273936000  |
| H  | -0.089954000 | -0.869587000 | 3.592425000  |
| H  | 4.148556000  | 0.100246000  | 2.938065000  |
| H  | 4.452446000  | -0.481349000 | 1.269227000  |

**Fe(III)-heme-trioxolane, E= -2554.978412**

|    |              |              |              |
|----|--------------|--------------|--------------|
| O  | -2.992895000 | 0.896348000  | 2.094936000  |
| C  | -2.732574000 | -0.088226000 | 2.955447000  |
| O  | -1.993386000 | -1.183935000 | 2.504779000  |
| C  | -0.584620000 | -1.044911000 | 2.594000000  |
| O  | -0.071852000 | -0.089326000 | 1.761507000  |
| Fe | 0.253700000  | 0.048714000  | -0.043556000 |
| N  | -1.514778000 | -0.605715000 | -0.979699000 |
| C  | -2.621550000 | 0.167834000  | -1.222067000 |
| C  | -3.745050000 | -0.677811000 | -1.558758000 |
| C  | -3.297434000 | -1.967345000 | -1.513187000 |
| C  | -1.898685000 | -1.911528000 | -1.149960000 |
| C  | -2.660231000 | 1.562071000  | -1.177861000 |
| C  | -1.586685000 | 2.409277000  | -0.897544000 |
| C  | -1.646064000 | 3.854080000  | -0.918355000 |
| C  | -0.390105000 | 4.305716000  | -0.626973000 |
| C  | 0.438569000  | 3.136842000  | -0.428343000 |
| N  | -0.313047000 | 2.001746000  | -0.593733000 |
| C  | 1.805832000  | 3.164566000  | -0.143212000 |
| C  | 2.642956000  | 2.054055000  | -0.011420000 |
| C  | 4.067978000  | 2.116494000  | 0.229122000  |
| C  | 4.518787000  | 0.827443000  | 0.268563000  |
| C  | 3.369818000  | -0.024394000 | 0.052397000  |

*Article submitted to Org. Biomol. Chem. 17 January 2011*

|   |              |              |              |
|---|--------------|--------------|--------------|
| N | 2.246471000  | 0.744735000  | -0.113758000 |
| H | -0.042139000 | 5.335639000  | -0.559200000 |
| H | -2.539155000 | 4.437758000  | -1.137385000 |
| H | -4.743682000 | -0.318266000 | -1.803219000 |
| H | -3.853271000 | -2.882563000 | -1.712644000 |
| C | -1.062022000 | -3.022504000 | -1.024373000 |
| C | 0.303073000  | -2.996237000 | -0.728952000 |
| C | 1.162004000  | -4.157851000 | -0.670427000 |
| C | 2.419729000  | -3.706350000 | -0.383384000 |
| C | 2.332137000  | -2.267945000 | -0.265271000 |
| N | 1.036777000  | -1.863861000 | -0.475700000 |
| H | 0.835925000  | -5.183246000 | -0.839800000 |
| H | 3.334559000  | -4.286548000 | -0.269477000 |
| C | 3.410985000  | -1.419678000 | -0.005469000 |
| H | 5.537620000  | 0.473395000  | 0.420577000  |
| H | 4.641362000  | 3.035603000  | 0.342792000  |
| H | 2.269142000  | 4.147727000  | -0.037987000 |
| H | -3.619060000 | 2.036197000  | -1.395968000 |
| H | -1.512048000 | -4.002397000 | -1.195920000 |
| H | 4.384662000  | -1.891223000 | 0.142828000  |
| H | -0.317745000 | -0.787431000 | 3.644764000  |
| H | -0.190064000 | -2.054024000 | 2.367782000  |
| H | -3.721175000 | -0.487974000 | 3.297286000  |
| H | -2.265111000 | 0.356171000  | 3.874653000  |
